# Supplementary material
Source: PubMed Central journal article supplement (PMC10868665)
Supplement: NIHMS1952693-supplement-Supplemental_Digital_Content_2_Figure.pdf [file NIHMS1952693-supplement-Supplemental_Digital_Content_2_Figure.pdf]

Supplemental Figure 1: Scatterplot of CYFIP1 levels against ADOS-2 comparison scores

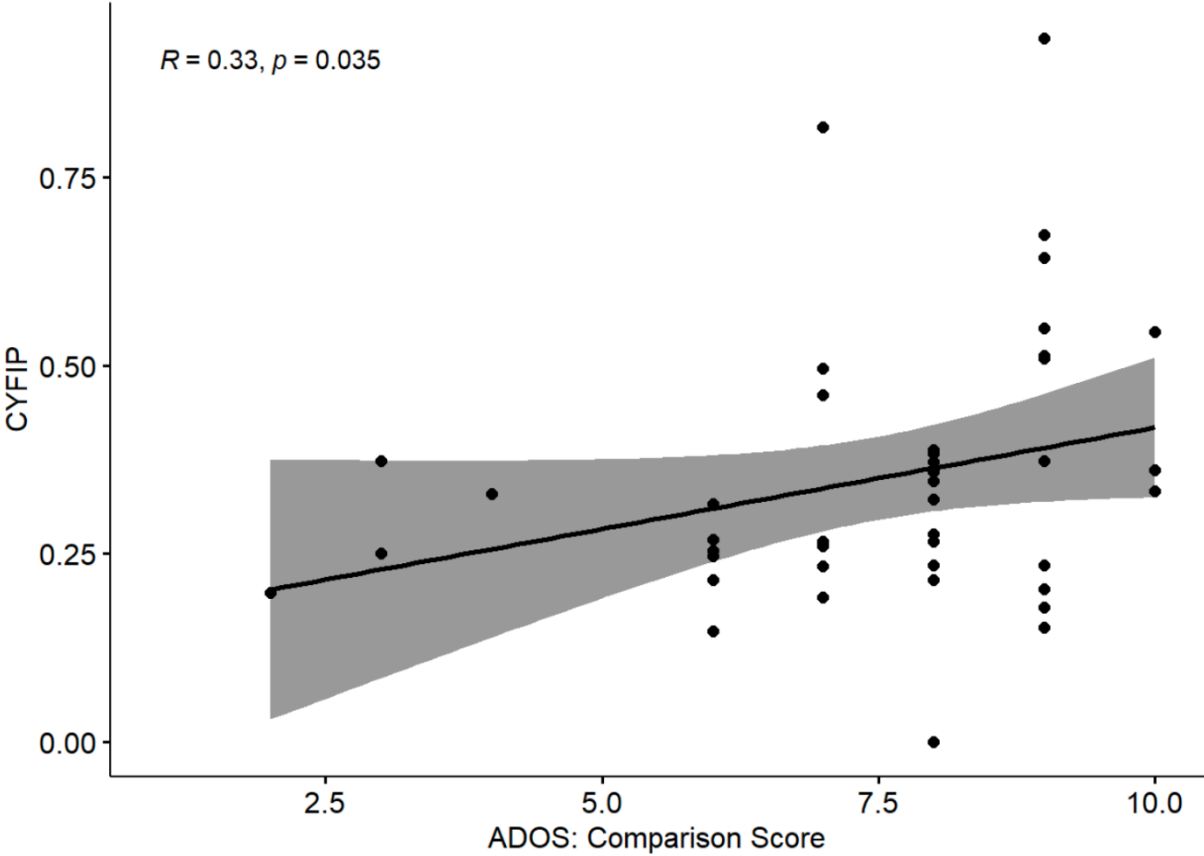

Note: ADOS-2: Autism Diagnostic Observation Scale
